# Supplementary material for: Tetrathiafulvalene: effective organic anodic materials for WO3-based electrochromic devices
Source: Royal Society of Chemistry journal article supplement (doi:10.1039/c9ra02840d), 2019-01-01
Supplement: c9ra02840d1.pdf [file c9ra02840d1.pdf]

## Supporting Information

# Tetrathiafulvalene: Effective Organic Anodic Materials for WO<sub>3</sub>-based Electrochromic Devices

Yong Min Kim,<sup>1,†</sup> Xinlin Li,<sup>2,†</sup> Keon-Woo Kim,<sup>3</sup> Se Hyun Kim,<sup>3\*</sup> and Hong Chul Moon<sup>1\*</sup>

<sup>1</sup>Department of Chemical Engineering, University of Seoul, Seoul 02504, Republic of Korea

<sup>2</sup>College of Electromechanical Engineering, Qingdao University, Qingdao 266071, China

<sup>3</sup>School of Chemical Engineering, Yeungnam University, Gyeongsan, North Gyeongsang 38541, Republic of Korea

\*Corresponding authors: hcmoon@uos.ac.kr (H. C. M), shkim@ynu.ac.kr (S. H. K),

<sup>†</sup>These authors equally contributed to this work.

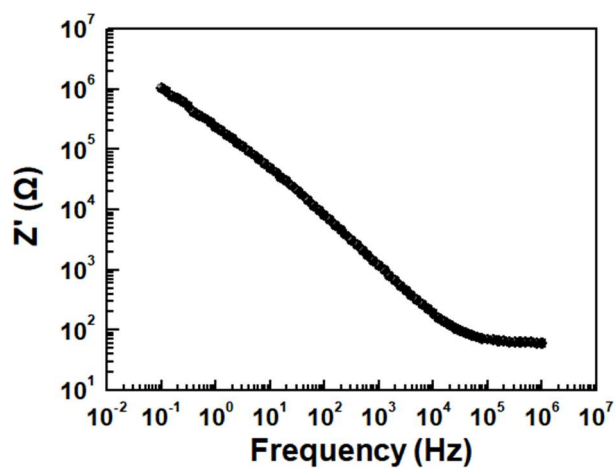

**Fig. S1** Plots of  $Z'$  as a function of frequency for the electrolyte solution containing 0.03M TTF. Inset scheme indicates the metal-insulator (electrolyte)-metal (MIM) configuration used in the electrochemical impedance (EIS) study, in which area (A) and thickness (h) of the cell were  $11.5 \text{ mm}^2$  and 0.4 mm, respectively.

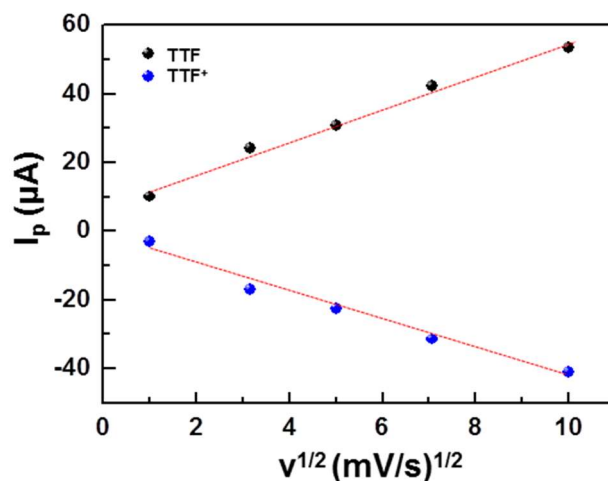

**Fig. S2** Plots of the peak current of the cyclic voltammograms given in Fig. 2 as a function of the square root of the scan rate, from which diffusion coefficient of TTF was estimated from the slope of the linear fit using Randles-Sevcik equation expressed by  $i_p = 0.4463 nFAC \left( \frac{nFvD}{RT} \right)^{\frac{1}{2}}$  where  $i_p$ ,  $n$ ,  $F$ ,  $A$ ,  $C$ ,  $R$ ,  $T$ ,  $D$  and  $v$  are the peak current, the number of electrons transferred in the redox reaction, electrode area, molecular concentration, gas constant, temperature, diffusion coefficient, and scan rate, respectively.

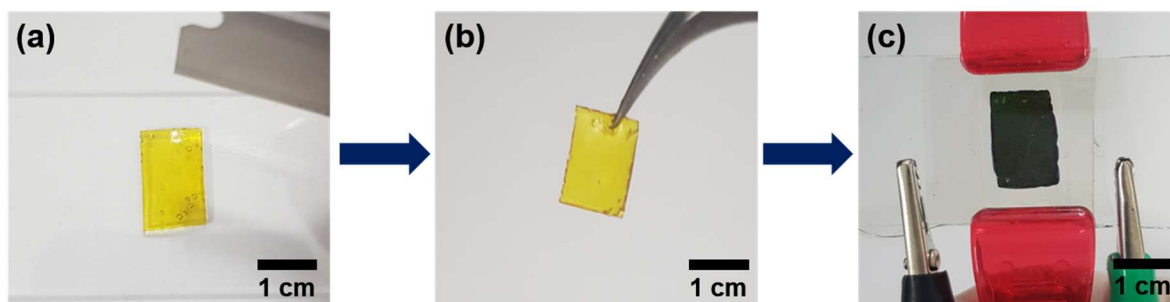

**Fig. S3** Device fabrication process through ‘cut-and-stick’ method: (a) cutting ion gels containing TTF into the desired shape, (b) transferring to the target electrode surface, and (c) assembling a top electrode and applying  $-0.9$  V for coloration.

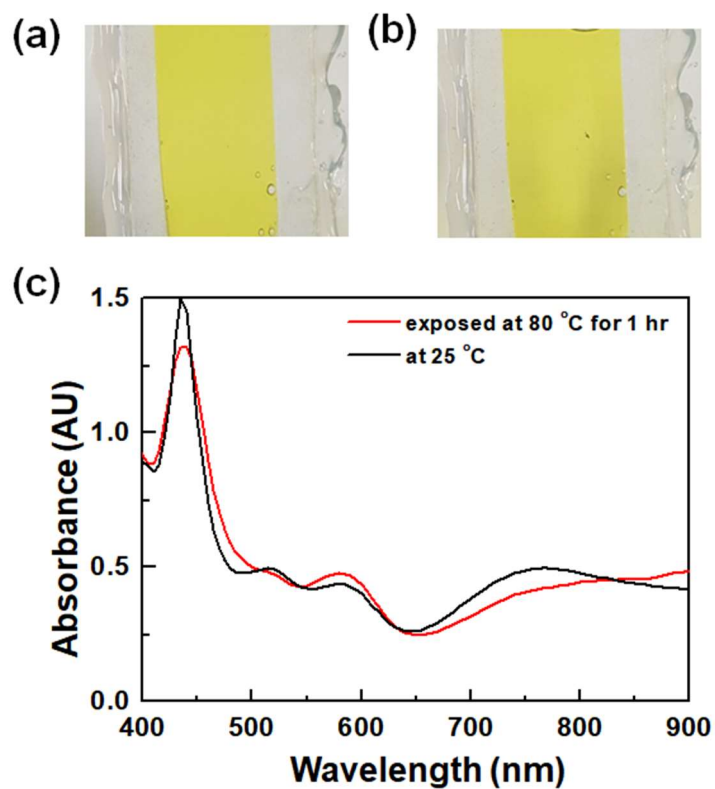

**Fig. S4** Photographs of the ECD containing 0.03 M TTF (a) at 25 °C and (b) after being exposed at 80 °C for 1 h. (c) UV-Vis absorption spectra of colored states at different conditions.

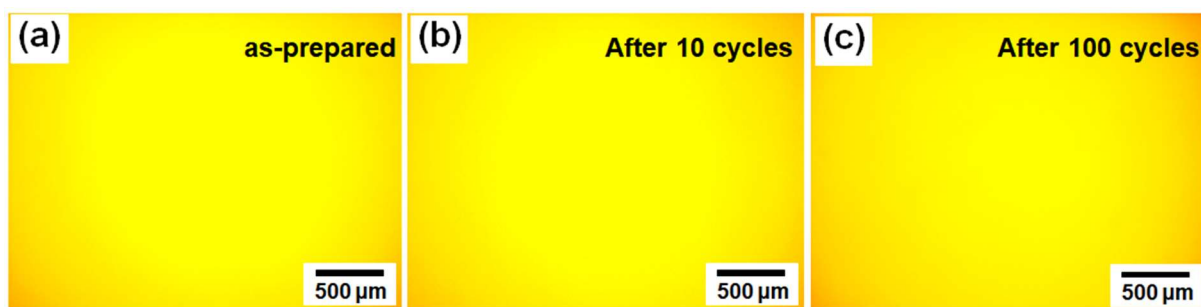

**Fig. S5** Optical photographs of 0.03 M TTF-containing electrolyte layer of the ECD: (a) as-prepared, (b) after 10 cycles, and (c) after 100 cycles.
